# Supplementary material for: The Use of Genome-Wide eQTL Associations in Lymphoblastoid Cell Lines to Identify Novel Genetic Pathways Involved in Complex Traits
Source: PLoS One. 2011 Jul 15;6(7):e22070. doi: 10.1371/journal.pone.0022070 (PMC3137612; doi:10.1371/journal.pone.0022070)
Supplement: Table S5 — Number of eQTL SNPs tagged by SNPs on GWA array (r2>0.8). (XLS) [file pone.0022070.s008.xls]

## Sheet: Sheet1
Dataset	No. eQTL SNPs	No. SNPs on GWA array	No. eQTL SNPs in LD with GWA SNP (%)*
3 Datasets	1989	535	1,482 (75%)
WTCHG V2	1932	451	1,357 (70%)
* r2 ³ 0.8
